# Supplementary material for: Structural determination of protein-based polymer blends with a promising tool: combination of FTIR and STXM spectroscopic imaging
Source: Royal Society of Chemistry journal article supplement (doi:10.1039/c4cp00556b), 2014-01-01
Supplement: c4cp00556b1.pdf [file c4cp00556b1.pdf]

## Supporting Information

### Structural determination of protein-based polymer blends with a promising tool — Combination of FTIR and STXM spectroscopic imaging

Shengjie Ling,<sup>a</sup> Zeming Qi,<sup>b</sup> Benjamin Watts,<sup>c</sup> Zhengzhong Shao<sup>a</sup> and Xin Chen<sup>\*a</sup>

<sup>a</sup>State Key Laboratory of Molecular Engineering of Polymers, Department of Macromolecular Science, Laboratory of Advanced Materials, Fudan University, Shanghai, 200433, People's Republic of China

<sup>b</sup>National Synchrotron Radiation Laboratory, University of Science and Technology of China, Hefei, 230029, People's Republic of China

<sup>c</sup>Swiss Light Source, Paul Scherrer Institute, Villigen-PSI, CH-5232, Switzerland

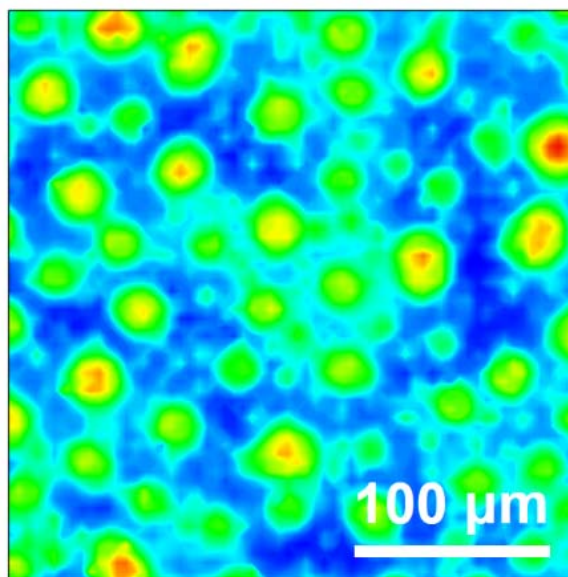

**Fig. S1.** SF-specific FTIR image of SF/PEO blend film prepared in a desiccator (relative humidity < 10%).
